# Supplementary material for: N-doped carbon-coated ultrasmall Nb2O5 nanocomposite with excellent long cyclability for sodium storage
Source: Royal Society of Chemistry journal article supplement (doi:10.1039/d0nr04922k), 2020-01-01
Supplement: d0nr04922k1.pdf [file d0nr04922k1.pdf]

## Supporting Information

### **N-doped carbon-coated ultrasmall Nb<sub>2</sub>O<sub>5</sub> nanocomposite with excellent long cyclability for sodium storage**

Zhigao Chen, Weimin Chen\*, Hongxia Wang, Zhuangwei Xiao, and Faquan Yu\*

Key Laboratory for Green Chemical Process of Ministry of Education,  
Hubei Key Laboratory for Novel Reactor and Green Chemistry Technology,  
Hubei Engineering Research Center for Advanced Fine Chemicals,  
School of Chemical Engineering and Pharmacy,  
Wuhan Institute of Technology, Wuhan 430205, (P.R. China)

Corresponding author:

Email: [fyu@wit.edu.cn](mailto:fyu@wit.edu.cn)

[wmchen@wit.edu.cn](mailto:wmchen@wit.edu.cn).

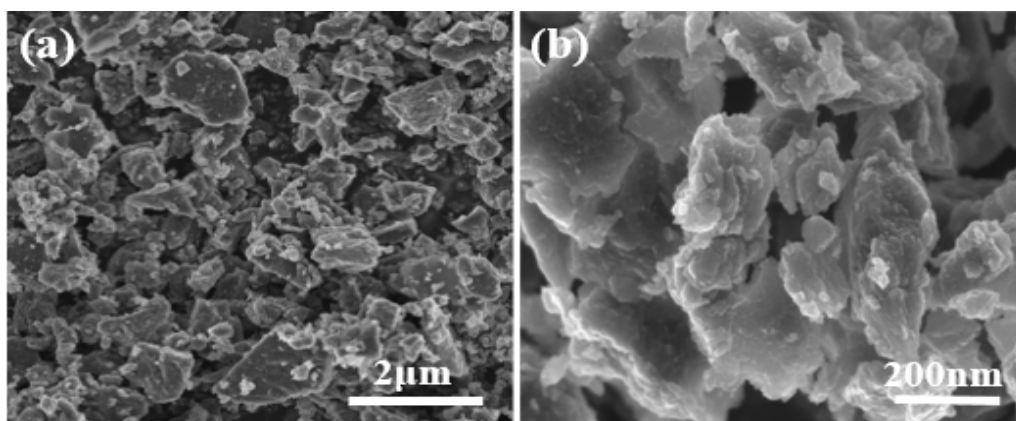

**Figure S1.** SEM images of 600-Nb<sub>2</sub>O<sub>5</sub>@NC-2.

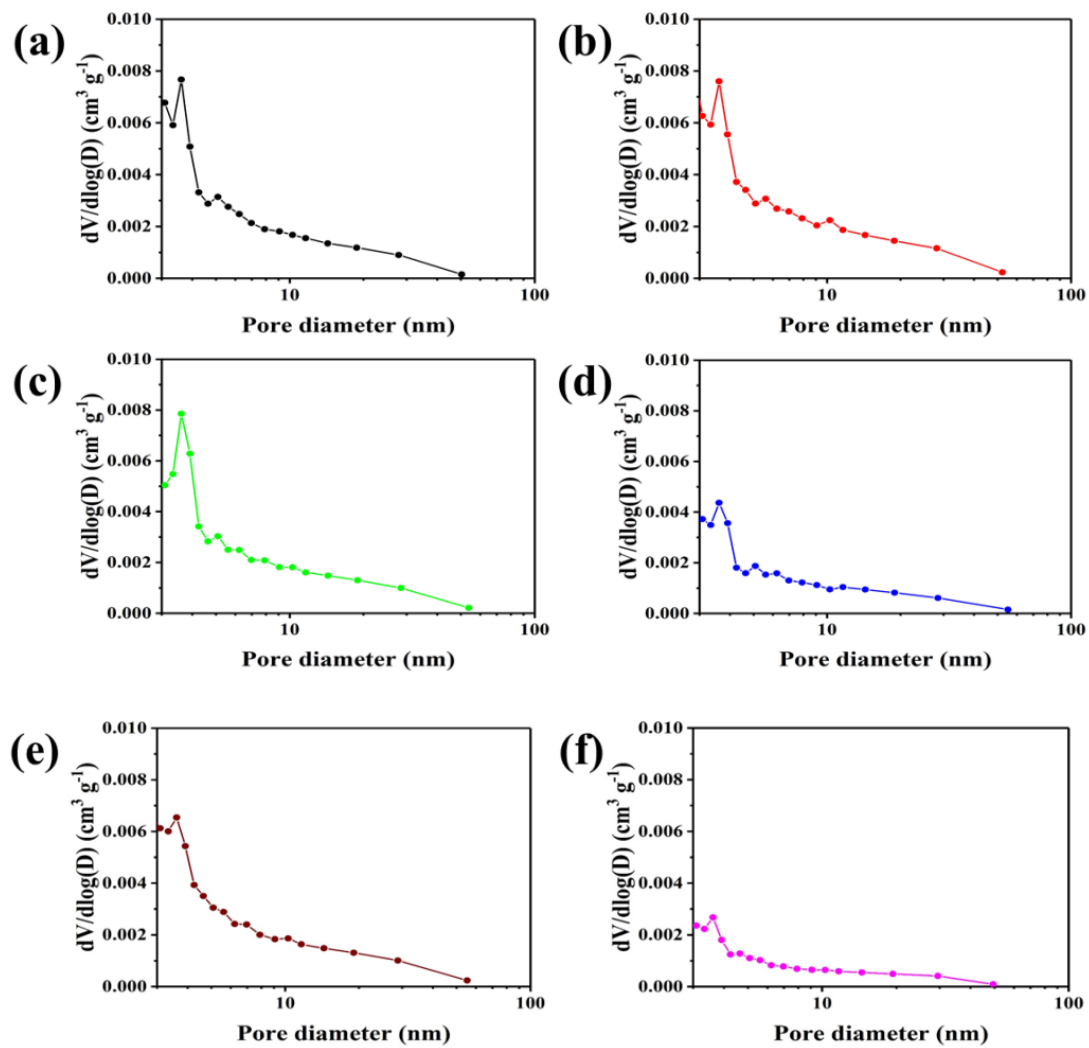

**Figure S2.** Pore size distribution of (a) 600-Nb<sub>2</sub>O<sub>5</sub>@C, (b) 600-Nb<sub>2</sub>O<sub>5</sub>@NC-10, (c) 600-Nb<sub>2</sub>O<sub>5</sub>@NC-5, (d) 600-Nb<sub>2</sub>O<sub>5</sub>@NC-2.5, (e) 600-Nb<sub>2</sub>O<sub>5</sub>@NC-2 and (f) 600-Nb<sub>2</sub>O<sub>5</sub>@NC-1.

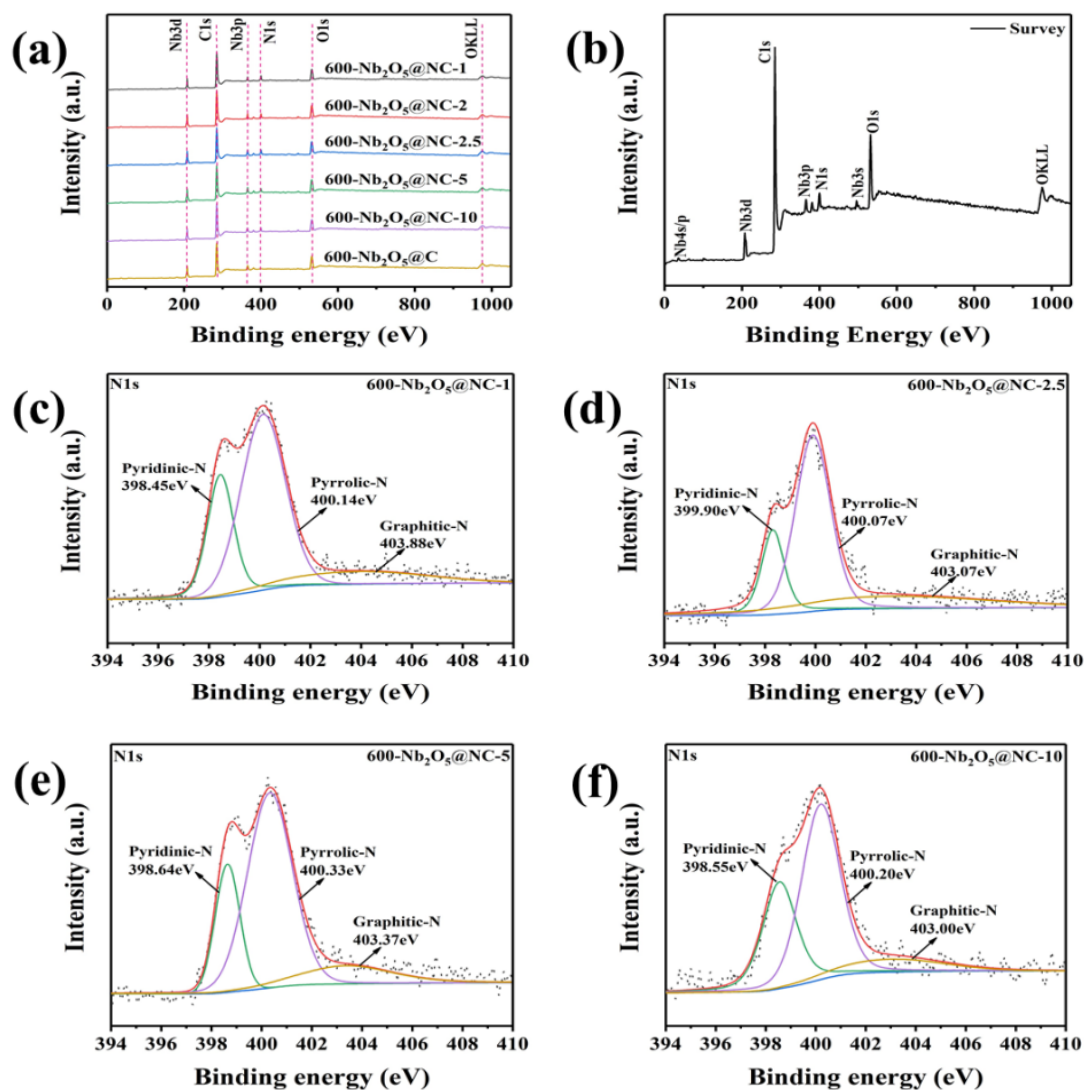

**Figure S3.** (a) XPS survey spectrum of the Synthetic composites of Nb<sub>2</sub>O<sub>5</sub>@NC and Nb<sub>2</sub>O<sub>5</sub>@C, (b) XPS survey spectrum of 600-Nb<sub>2</sub>O<sub>5</sub>@NC-2, High-resolution XPS N1s spectra of (c) 600-Nb<sub>2</sub>O<sub>5</sub>@NC-1, (d) 600-Nb<sub>2</sub>O<sub>5</sub>@NC-2.5, (e) 600-Nb<sub>2</sub>O<sub>5</sub>@NC-5 and (f) 600-Nb<sub>2</sub>O<sub>5</sub>@NC-10.

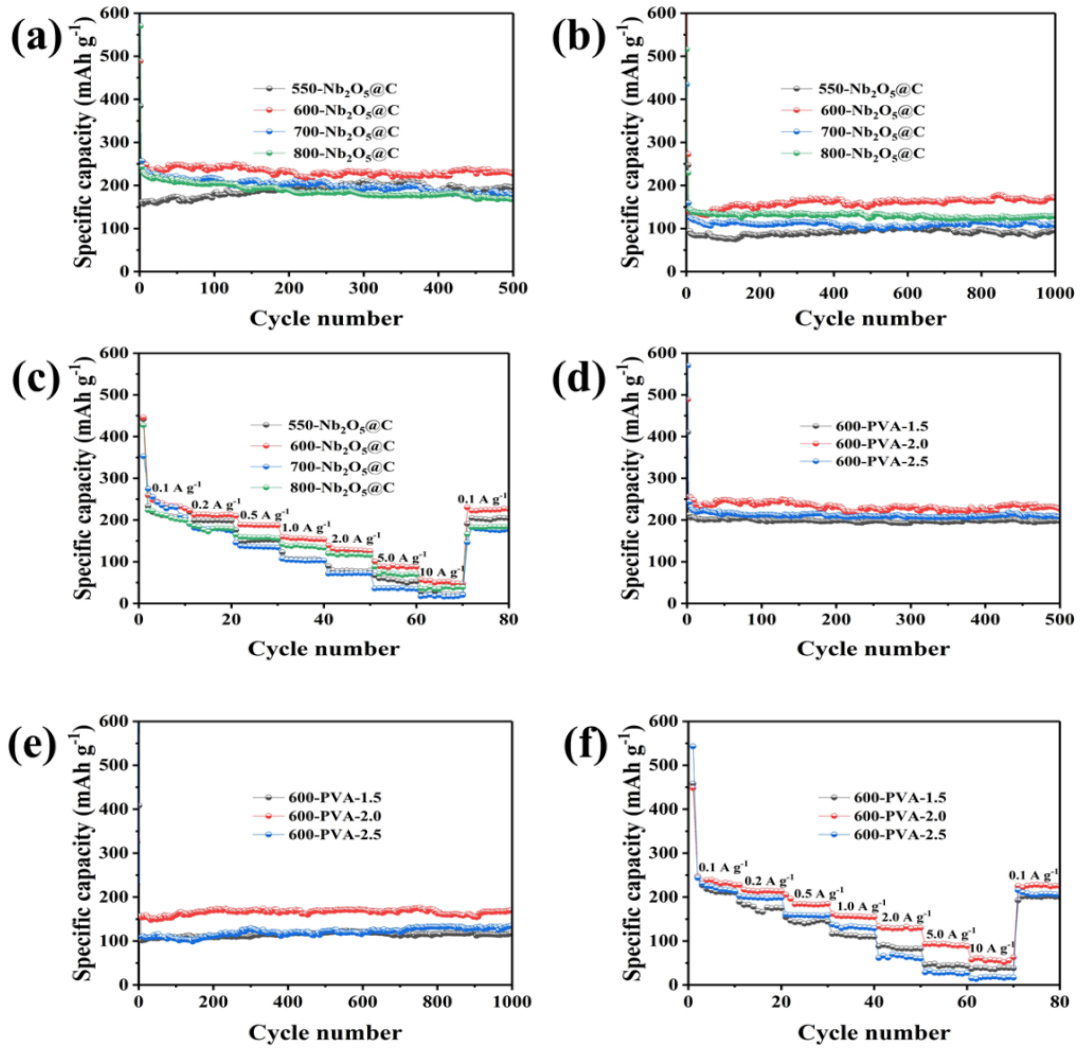

**Figure S4.** Exploring experiments on the effects of temperature (550-800 °C) and PVA addition (1.5-2.5 g) on cycling performance of (a) and (d) at a current density of 0.1 A g<sup>-1</sup>, (b) and (e) at a current density of 1 A g<sup>-1</sup>, (c) and (f) at various current densities.

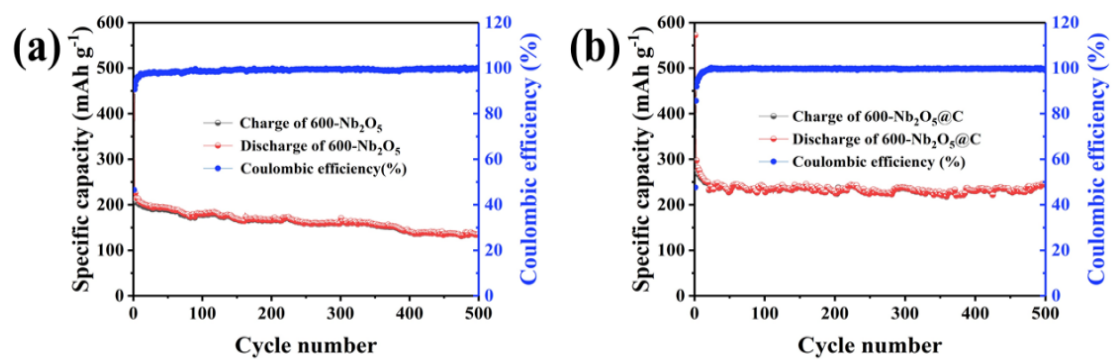

**Figure S5.** Cycling performances of (a) 600-Nb<sub>2</sub>O<sub>5</sub> and (b) 600-Nb<sub>2</sub>O<sub>5</sub>@C at a current density of 0.1 A g<sup>-1</sup>.

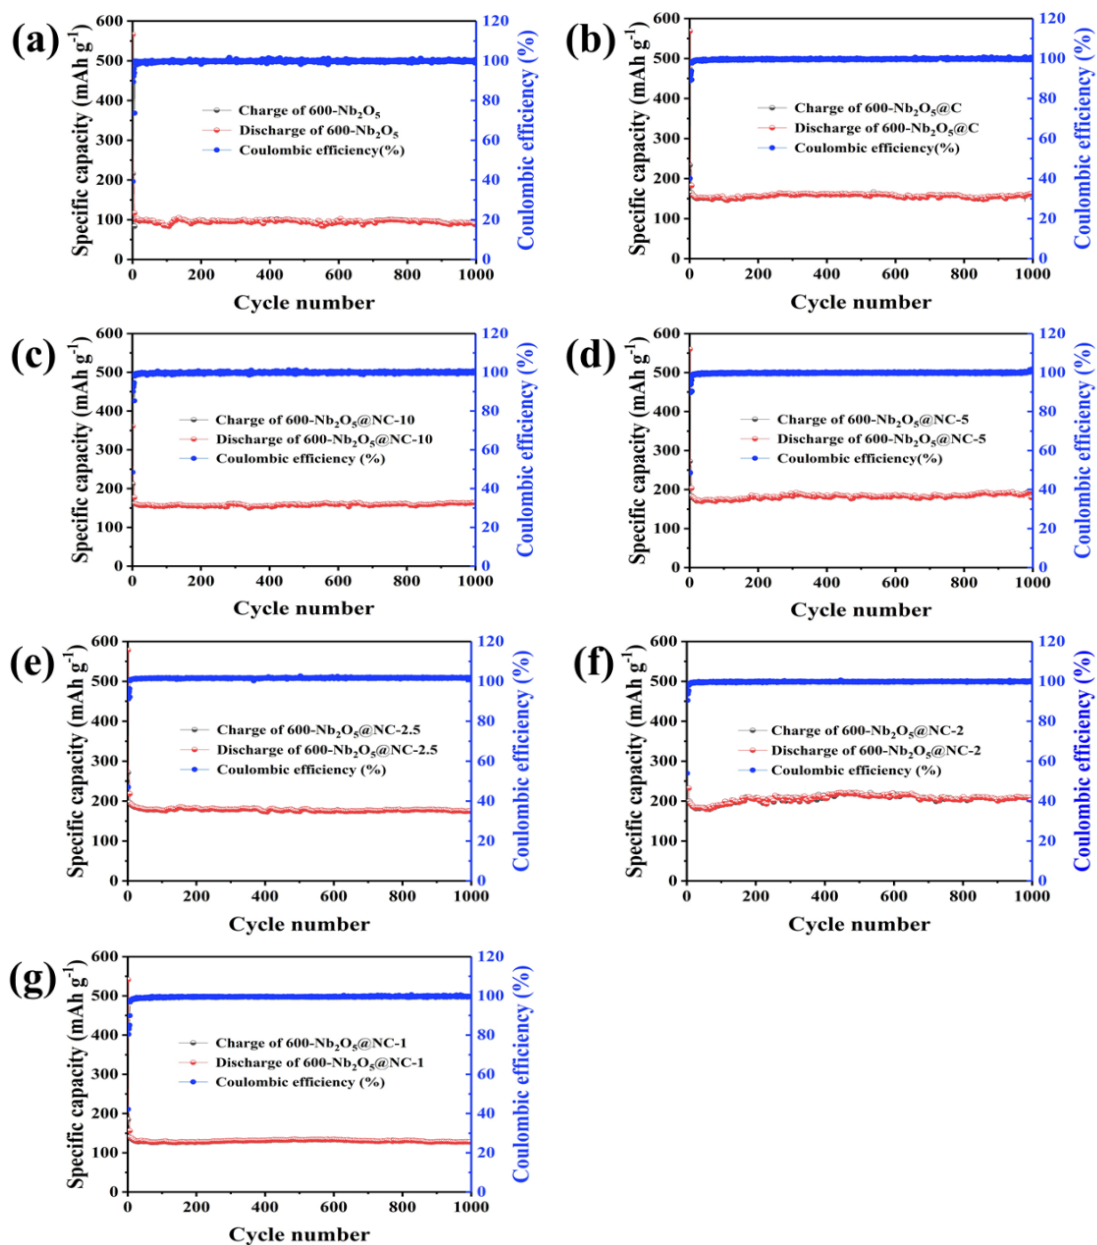

**Figure S6.** Cycling performances of (a) 600-Nb<sub>2</sub>O<sub>5</sub>, (b) 600-Nb<sub>2</sub>O<sub>5</sub>@C, (c) 600-Nb<sub>2</sub>O<sub>5</sub>@NC-10, (d) 600-Nb<sub>2</sub>O<sub>5</sub>@NC-5, (e) 600-Nb<sub>2</sub>O<sub>5</sub>@NC-2.5, (f) 600-Nb<sub>2</sub>O<sub>5</sub>@NC-2 and (g) 600-Nb<sub>2</sub>O<sub>5</sub>@NC-1 at a current density of 1.0 A g<sup>-1</sup>.

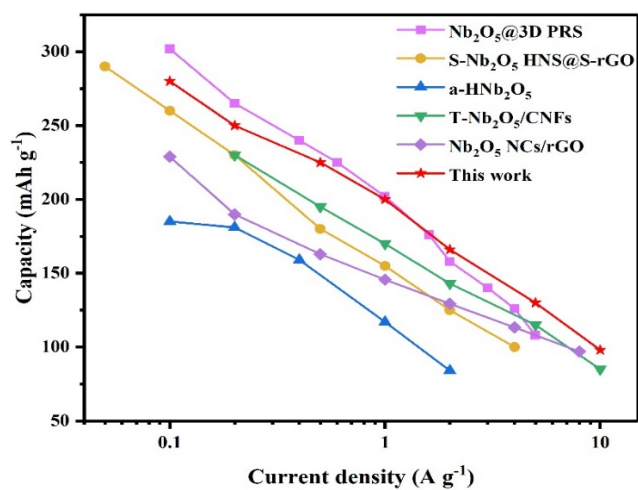

**Figure S7.** Comparisons between the rate performances of this work and other reported Nb<sub>2</sub>O<sub>5</sub>-based SIB anodes.

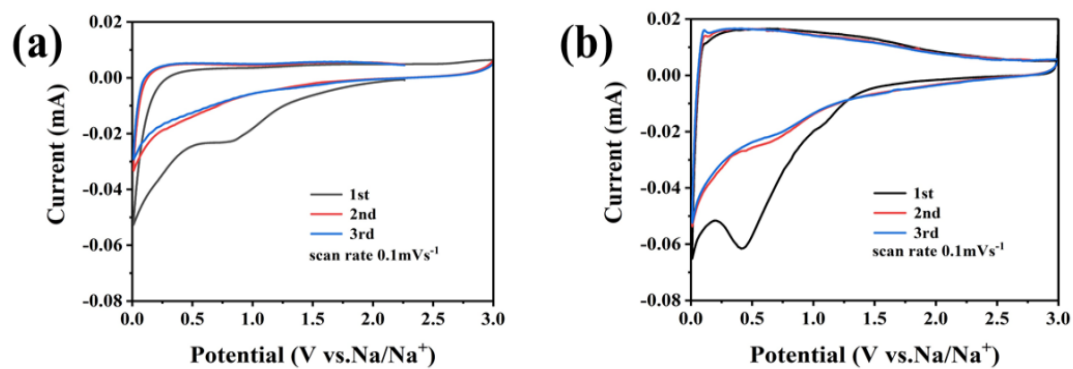

**Figure S8.** Cyclic voltammetry curves of (a) 600-Nb<sub>2</sub>O<sub>5</sub> and (b) 600-Nb<sub>2</sub>O<sub>5</sub>@C at scan rates of 0.1 mV s<sup>-1</sup> in the voltage range of 0.01–3 V.



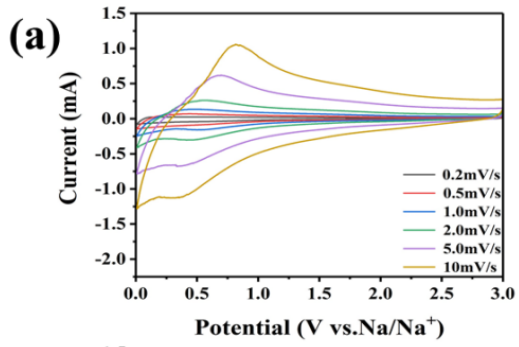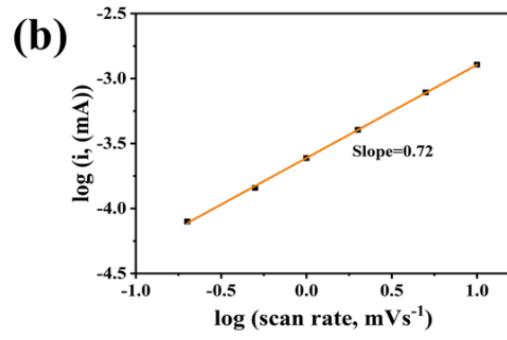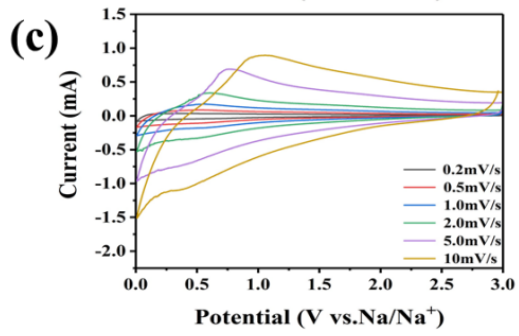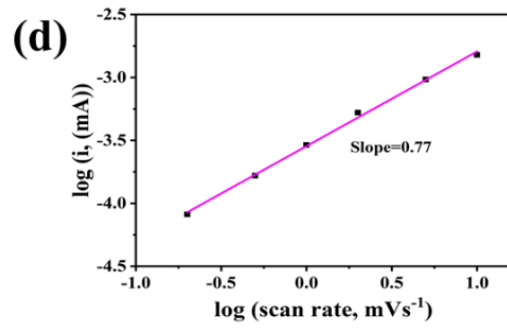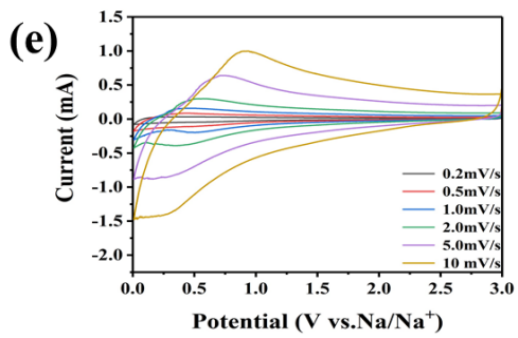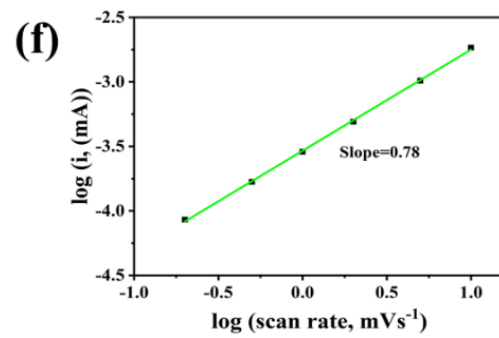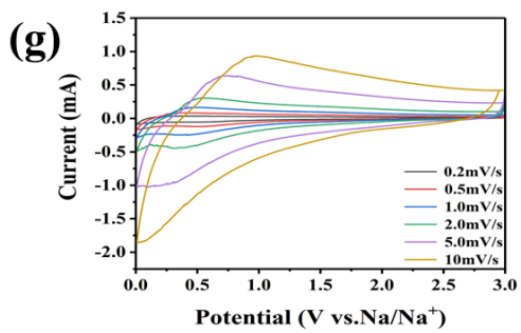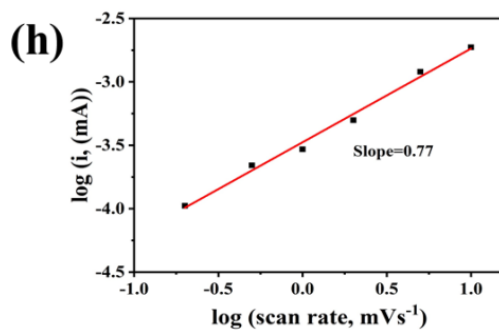

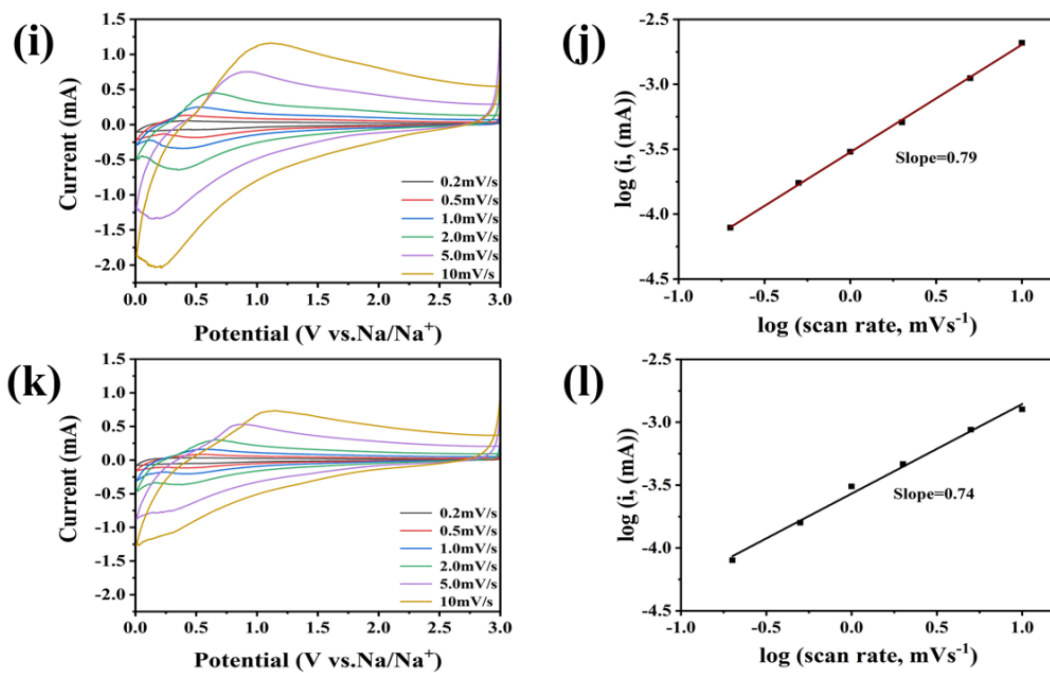

**Figure S9.** CV curves at various scan rates ( $\nu$ ) from 0.2 to 10  $\text{mV s}^{-1}$  for (a) 600-Nb<sub>2</sub>O<sub>5</sub>@C, (c) 600-Nb<sub>2</sub>O<sub>5</sub>@NC-10, (e) 600-Nb<sub>2</sub>O<sub>5</sub>@NC-5, (g) 600-Nb<sub>2</sub>O<sub>5</sub>@NC-2.5, (i) 600-Nb<sub>2</sub>O<sub>5</sub>@NC-2 and (k) 600-Nb<sub>2</sub>O<sub>5</sub>@NC-1. Relationship between the peak current and the scan rate ( the  $\log(\nu)$ - $\log(i_p)$  profiles) of (b) 600-Nb<sub>2</sub>O<sub>5</sub>@C, (d) 600-Nb<sub>2</sub>O<sub>5</sub>@NC-10, (f) 600-Nb<sub>2</sub>O<sub>5</sub>@NC-5, (h) 600-Nb<sub>2</sub>O<sub>5</sub>@NC-2.5, (j) 600-Nb<sub>2</sub>O<sub>5</sub>@NC-2 and (l) 600-Nb<sub>2</sub>O<sub>5</sub>@NC-1.

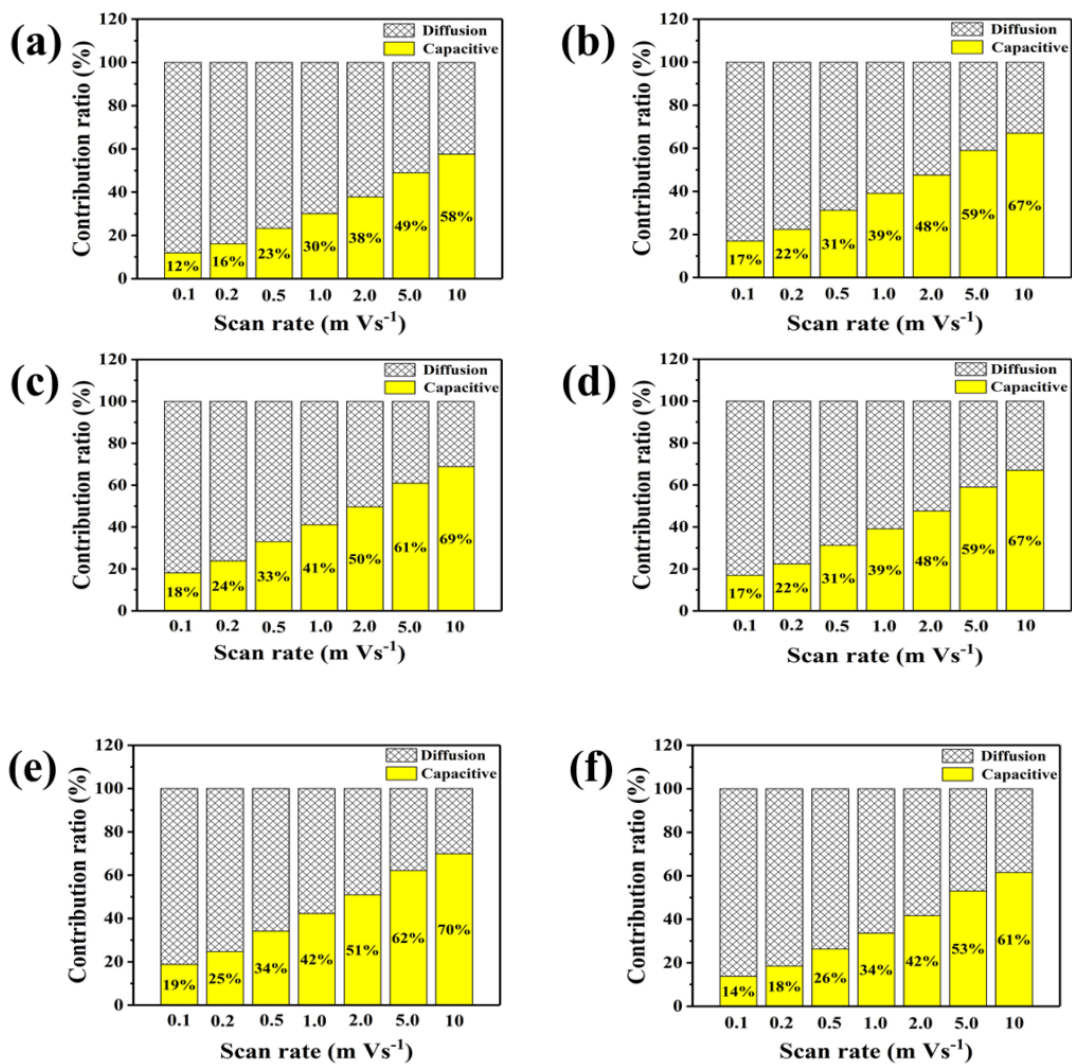

**Figure S10.** Contribution ratio of the capacitive and diffusion-controlled capacity versus scan rate of (a) 600-Nb<sub>2</sub>O<sub>5</sub>@C, (b) 600-Nb<sub>2</sub>O<sub>5</sub>@NC-10, (c) 600-Nb<sub>2</sub>O<sub>5</sub>@NC-5, (d) 600-Nb<sub>2</sub>O<sub>5</sub>@NC-2.5, (e) 600-Nb<sub>2</sub>O<sub>5</sub>@NC-2 and (f) 600-Nb<sub>2</sub>O<sub>5</sub>@NC-1.

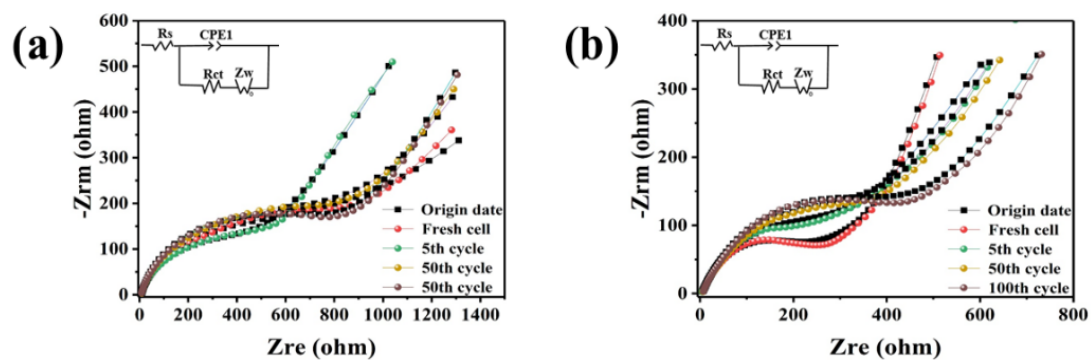

**Figure S11.** The Nyquist plots of (a) 600-Nb<sub>2</sub>O<sub>5</sub> and (b) 600-Nb<sub>2</sub>O<sub>5</sub>@C electrodes before and after 5th, 50th, 100th cycles at a current density of 0.1 A g<sup>-1</sup> with equivalent circuit inset.

**Table S1.** D-band and G-band ratios in Raman spectroscopy of composite materials

| Types of materials                         | Raman shift( $\text{cm}^{-1}$ ) | ratio                                |
|--------------------------------------------|---------------------------------|--------------------------------------|
| 600-Nb <sub>2</sub> O <sub>5</sub> @NC-1   | D Bond: 1354.12                 | I <sub>D</sub> /I <sub>G</sub> =0.93 |
|                                            | G Bond: 1586.96                 |                                      |
| 600-Nb <sub>2</sub> O <sub>5</sub> @NC-2   | D Bond: 1357.75                 | I <sub>D</sub> /I <sub>G</sub> =0.91 |
|                                            | G Bond: 1588.29                 |                                      |
| 600-Nb <sub>2</sub> O <sub>5</sub> @NC-2.5 | D Bond: 1360.97                 | I <sub>D</sub> /I <sub>G</sub> =0.88 |
|                                            | G Bond: 1586.35                 |                                      |
| 600-Nb <sub>2</sub> O <sub>5</sub> @NC-5   | D Bond: 1349.47                 | I <sub>D</sub> /I <sub>G</sub> =0.87 |
|                                            | G Bond: 1586.24                 |                                      |
| 600-Nb <sub>2</sub> O <sub>5</sub> @NC-10  | D Bond: 1346.66                 | I <sub>D</sub> /I <sub>G</sub> =0.86 |
|                                            | G Bond: 1585.02                 |                                      |
| 600-Nb <sub>2</sub> O <sub>5</sub> @C      | D Bond: 1351.55                 | I <sub>D</sub> /I <sub>G</sub> =0.86 |
|                                            | G Bond: 1592.81                 |                                      |

**Table S2.** Brunauer-Emmett-Teller (BET) specific surface area and pore-size distribution of composite materials

| Types of materials                         | Surface Area( $\text{m}^2/\text{g}$ ) | Average pore diameter(nm) |
|--------------------------------------------|---------------------------------------|---------------------------|
| 600-Nb <sub>2</sub> O <sub>5</sub> @C      | 182.69                                | 4.14                      |
| 600-Nb <sub>2</sub> O <sub>5</sub> @NC-10  | 190.67                                | 4.53                      |
| 600-Nb <sub>2</sub> O <sub>5</sub> @NC-5   | 180.95                                | 4.31                      |
| 600-Nb <sub>2</sub> O <sub>5</sub> @NC-2.5 | 130.27                                | 4.17                      |
| 600-Nb <sub>2</sub> O <sub>5</sub> @NC-2   | 136.67                                | 4.98                      |
| 600-Nb <sub>2</sub> O <sub>5</sub> @NC-1   | 60.75                                 | 5.32                      |

**Table S3.** The chemical composition in atomic of nitrogen concentration derived from XPS peaks of 600-Nb<sub>2</sub>O<sub>5</sub>@NC-1, 600-Nb<sub>2</sub>O<sub>5</sub>@NC-2, 600-Nb<sub>2</sub>O<sub>5</sub>@NC-2.5, 600-Nb<sub>2</sub>O<sub>5</sub>@NC-5 and 600-Nb<sub>2</sub>O<sub>5</sub>@NC-10, respectively.

| Types of materials                         | N(%) | Pyridinic<br>N(%) | Pyrrolic N(%) | Graphitic<br>N(%) |
|--------------------------------------------|------|-------------------|---------------|-------------------|
| 600-Nb <sub>2</sub> O <sub>5</sub> @NC-1   | 5.72 | 26.83             | 59.85         | 13.32             |
| 600-Nb <sub>2</sub> O <sub>5</sub> @NC-2   | 5.17 | 31.06             | 65.98         | 2.96              |
| 600-Nb <sub>2</sub> O <sub>5</sub> @NC-2.5 | 4.48 | 19.34             | 56.82         | 23.84             |
| 600-Nb <sub>2</sub> O <sub>5</sub> @NC-5   | 3.88 | 22.30             | 63.90         | 13.71             |
| 600-Nb <sub>2</sub> O <sub>5</sub> @NC-10  | 3.37 | 30.87             | 57.61         | 11.52             |

**Table S4.** Comparison of Nb<sub>2</sub>O<sub>5</sub>-based anodes in sodium-ion batteries

| Electrode material name                     | Specific capacity at low rate     | Specific capacity at high rate   | Max cycle number | References |
|---------------------------------------------|-----------------------------------|----------------------------------|------------------|------------|
| Nb <sub>2</sub> O <sub>5</sub> @3D PRS      | 271 mAh g <sup>-1</sup> at 0.5 C  | 130 mAh g <sup>-1</sup> at 10 C  | 7500             | [1]        |
| S-Nb <sub>2</sub> O <sub>5</sub> HNS@S-rGO  | 215 mAh g <sup>-1</sup> at 0.5 C  | 100 mAh g <sup>-1</sup> at 20 C  | 3000             | [2]        |
| a-H-Nb <sub>2</sub> O <sub>5</sub>          | 185 mAh g <sup>-1</sup> at 0.2 C  | 109 mAh g <sup>-1</sup> at 5 C   | 3000             | [3]        |
| G-Nb <sub>2</sub> O <sub>5</sub> nanosheets | 230 mAh g <sup>-1</sup> at 0.25 C | 100 mAh g <sup>-1</sup> at 20 C  | 1000             | [4]        |
| m-Nb <sub>2</sub> O <sub>5</sub> -C         |                                   | 175 mAh g <sup>-1</sup> at 0.5 C | 300              | [5]        |
| T-Nb <sub>2</sub> O <sub>5</sub> / NCFs     | 196.8 mAh g <sup>-1</sup> at 1 C  | 97 mAh g <sup>-1</sup> at 40 C   | 5000             | [6]        |
| Nb <sub>2</sub> O <sub>5</sub> NCs/rGO      | 242 mAh g <sup>-1</sup> at 1 C    | 60 mAh g <sup>-1</sup> at 50 C   | 5000             | [7]        |
| 600-Nb <sub>2</sub> O <sub>5</sub> @NC-2    | 280 mAh g <sup>-1</sup> at 0.5 C  | 95.9 mAh g <sup>-1</sup> at 50 C | 3000             | This work  |

**Table S5.** Fitting results of the data in Figure S10 with the simulated impedance parameters ( $R_s$ ,  $R_{ct}$ ) obtained from the proposed equivalent circuit before and after 5<sup>th</sup>, 50<sup>th</sup>, 100<sup>th</sup> cycles of 600-Nb<sub>2</sub>O<sub>5</sub>, 600-Nb<sub>2</sub>O<sub>5</sub>@C and 600-Nb<sub>2</sub>O<sub>5</sub>@NC-2 anodes at a current density of 0.1 A g<sup>-1</sup>

| Sample       | 600-Nb <sub>2</sub> O <sub>5</sub> |                       | 600-Nb <sub>2</sub> O <sub>5</sub> @C |                       | 600-Nb <sub>2</sub> O <sub>5</sub> @NC-2 |                       |
|--------------|------------------------------------|-----------------------|---------------------------------------|-----------------------|------------------------------------------|-----------------------|
|              | $R_s$ ( $\Omega$ )                 | $R_{ct}$ ( $\Omega$ ) | $R_s$ ( $\Omega$ )                    | $R_{ct}$ ( $\Omega$ ) | $R_s$ ( $\Omega$ )                       | $R_{ct}$ ( $\Omega$ ) |
| Before cycle | 8.7                                | 202.6                 | 4                                     | 205.6                 | 3.6                                      | 242.3                 |
| 5th cycle    | 8.4                                | 263.7                 | 3.7                                   | 168.2                 | 4.7                                      | 198.6                 |
| 50th cycle   | 8.6                                | 425.8                 | 4.6                                   | 251.3                 | 5.7                                      | 140.2                 |
| 100th cycle  | 7.5                                | 585.4                 | 4.9                                   | 332.5                 | 3.9                                      | 129.6                 |



## Reference

1. H. Yang, R. Xu, Y. Gong, Y. Yao, L. Gu and Y. Yu, *Nano Energy*, 2018, **48**, 448-455.
2. F. F. Liu, X. L. Cheng, R. Xu, Y. Wu, Y. Jiang and Y. Yu, *Adv. Funct. Mater.*, 2018, **28**, 1800394.
3. J. F. Ni, W. C. Wang, C. Wu, H. C. Liang, J. Maier, Y. Yu and L. Li, *Adv. Mater.*, 2017, **29**, 1605607.
4. L. Wang, X. F. Bi and S. B. Yang, *Adv. Mater.*, 2016, **28**, 7672-7679.
5. H. Kim, E. Lim, C. Jo, G. Yoon, J. Hwang, S. Jeong, J. Lee and K. Kang, *Nano Energy*, 2015, **16**, 62-70.
6. L. P. Yang, Y. E. Zhu, J. Sheng, F. Li, B. Tang, Y. Zhang and Z. Zhou, *small*, 2017, **13**, 1702588.
7. L. T. Yan, G. Chen, S. Sarker, S. Richins, H. Q. Wang, W. C. Xu, X. H. Rui and H. M. Luo, *ACS Appl. Mater. Interfaces*, 2016, **8**, 22213-22219.
